# Supplementary material
Source: PubMed Central journal article supplement (PMC5869848)

**S1** Mean and median of both extraction methods (QIA and POL) compared to the Baermann method results

**BAERMANN**

| <b>QIA</b>               | Negative            | Positive               |
|--------------------------|---------------------|------------------------|
| Mean (SD)                | 108.9 (239.2)       | 54.3 (109.2)           |
| Percentile 50% (25%;75%) | 5.1 (2.7-33.9)      | 11.4 (1.5-49.6)        |
| <b>POL</b>               |                     |                        |
| Mean (SD)                | 3628.3 (7739.3)     | 67371.9 (235549.1)     |
| Percentile 50% (25%;75%) | 177.1 (32.4-2017.7) | 7507.1 (399.1-20555.5) |

**S2: ROC curve of Ct threshold**

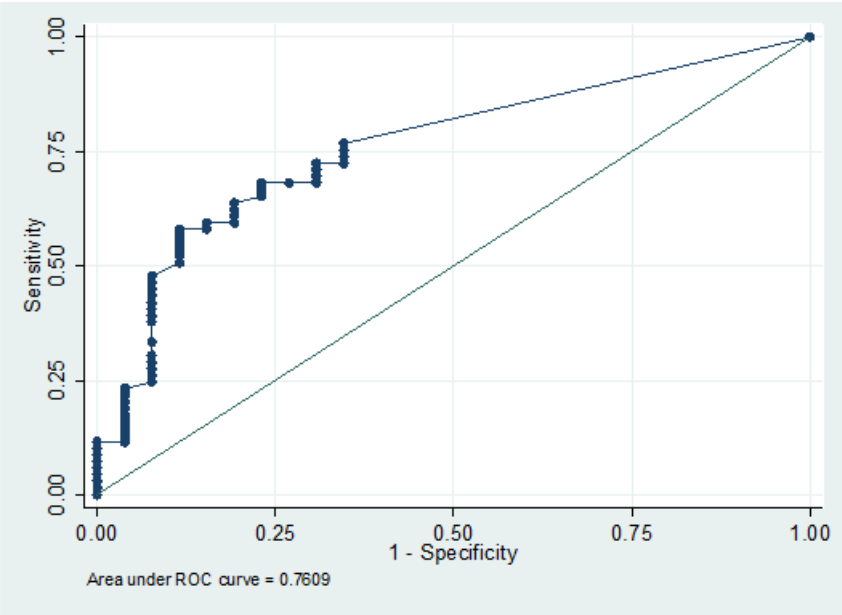

Supplement: JCM.01941-17_zjm999095883s1.pdf [file JCM.01941-17_zjm999095883s1.pdf]
